# Supplementary material
Source: PubMed Central journal article supplement (PMC6090320)

## Supplementary material

Table S1. Inter-rater agreement in Senegal (Groups 1, 2 & 3; n = 361)

|                    |                     | Examiner 2 |          | Kappa (95% CI)   |
|--------------------|---------------------|------------|----------|------------------|
|                    |                     | Positive   | Negative |                  |
| SD Bioline (n=361) | Examiner 1 Positive | 41         | 4        | 0.90 (0.83-0.97) |
|                    | Examiner 1 Negative | 4          | 312      |                  |
| Insight (n=361)    | Examiner 1 Positive | 45         | 5        | 0.81 (0.73-0.90) |
|                    | Examiner 1 Negative | 12         | 299      |                  |
| OneStep (n=334)    | Examiner 1 Positive | 59         | 2        | 0.96 (0.92-0.99) |
|                    | Examiner 1 Negative | 2          | 271      |                  |

Table S2. Performance of rapid diagnostic tests (RDTs) for HBeAg detection by laboratory staff in Senegal (Group 1 and Group 2)

|            |          | Senegalese samples                   |           |                                          |           |
|------------|----------|--------------------------------------|-----------|------------------------------------------|-----------|
|            |          | Group 1: HBeAg-positive cases (n=48) |           | Group 2: HBeAg-negative controls (n=196) |           |
|            |          | Sensitivity                          | 95% CI    | Specificity                              | 95% CI    |
| SD Bioline | Reader 1 | 31.3% (15/48)                        | 18.7-46.3 | 100% (196/196)                           | 98.1-100  |
|            | Reader 2 | 29.2% (14/48)                        | 17.0-44.1 | 100% (196/196)                           | 98.1-100  |
| Insight    | Reader 1 | 31.3% (15/48)                        | 18.7-46.3 | 100% (196/196)                           | 98.1-100  |
|            | Reader 2 | 33.3% (16/48)                        | 20.4-48.4 | 100% (196/196)                           | 98.1-100  |
| OneStep    | Reader 1 | 43.9% (18/41)                        | 28.5-60.3 | 97.9% (183/187)                          | 94.6-99.4 |
|            | Reader 2 | 41.5% (17/41)                        | 26.3-57.9 | 98.4% (184/187)                          | 95.4-99.7 |

Table S3. Proportion of HBeAg-positive samples successfully detected by each RDT at various qHBeAg levels in Senegal (all the samples in Group 1 and 68 HBeAg-positive samples in Group 3; n=116)

| qHBeAg (log <sub>10</sub> PEIU/ml) | SD Bioline (n=111)* |              |    | Insight (n=101)* |              |    | OneStep (n=104)* |              |     |
|------------------------------------|---------------------|--------------|----|------------------|--------------|----|------------------|--------------|-----|
|                                    | No. tested          | No. positive | %  | No. tested       | No. positive | %  | No. tested       | No. positive | %   |
| ≥3.0                               | 14                  | 11           | 79 | 14               | 12           | 86 | 13               | 13           | 100 |
| 2.5 – 3.0                          | 19                  | 17           | 90 | 19               | 18           | 95 | 19               | 19           | 100 |
| 2.0 – 2.5                          | 14                  | 11           | 79 | 14               | 12           | 86 | 14               | 13           | 93  |
| 1.5 – 2.0                          | 13                  | 1            | 8  | 7                | 1            | 14 | 12               | 6            | 50  |
| 1.0 – 1.5                          | 14                  | 0            | 0  | 10               | 0            | 0  | 12               | 2            | 17  |
| 0.5 – 1.0                          | 15                  | 0            | 0  | 15               | 0            | 0  | 14               | 2            | 14  |
| <0.5                               | 22                  | 0            | 0  | 22               | 0            | 0  | 20               | 0            | 0   |

\* Discordant results between two laboratory staff were excluded.

Table S4. Prevalence of HBeAg by different HBeAg assays at various HBV DNA levels in Senegal (Groups 1, 2 & 3; n = 361)

| HBV DNA (log10 IU/ml) | SD Bioline (n=353)* |              |    | Insight (n=344)* |              |    | OneStep (n=330)* |              |    | Architect (n=361) |              |    |
|-----------------------|---------------------|--------------|----|------------------|--------------|----|------------------|--------------|----|-------------------|--------------|----|
|                       | No. tested          | No. positive | %  | No. tested       | No. positive | %  | No. tested       | No. positive | %  | No. tested        | No. positive | %  |
| ≥8.0                  | 59                  | 29           | 49 | 58               | 33           | 57 | 56               | 36           | 64 | 65                | 55           | 85 |
| 7.0-8.0               | 57                  | 7            | 12 | 50               | 7            | 14 | 49               | 16           | 33 | 57                | 35           | 61 |
| 6.0-7.0               | 42                  | 5            | 12 | 41               | 5            | 12 | 40               | 4            | 10 | 44                | 20           | 46 |
| 5.0-6.0               | 17                  | 0            | 0  | 17               | 0            | 0  | 17               | 0            | 0  | 17                | 2            | 12 |
| 4.0-5.0               | 17                  | 0            | 0  | 17               | 0            | 0  | 17               | 0            | 0  | 17                | 1            | 6  |
| 3.0-4.0               | 71                  | 0            | 0  | 71               | 0            | 0  | 67               | 2            | 3  | 71                | 2            | 3  |
| 2.0-3.0               | 58                  | 0            | 0  | 58               | 0            | 0  | 54               | 1            | 2  | 58                | 0            | 0  |
| <2.0                  | 32                  | 0            | 0  | 32               | 0            | 0  | 30               | 0            | 0  | 32                | 1            | 3  |

\* Discordant results between two laboratory staff were excluded.

Figure S1. Correlation between qHBeAg (log PEIU/ml) and age (years) in HBeAg-positive samples in Senegal (n=116)

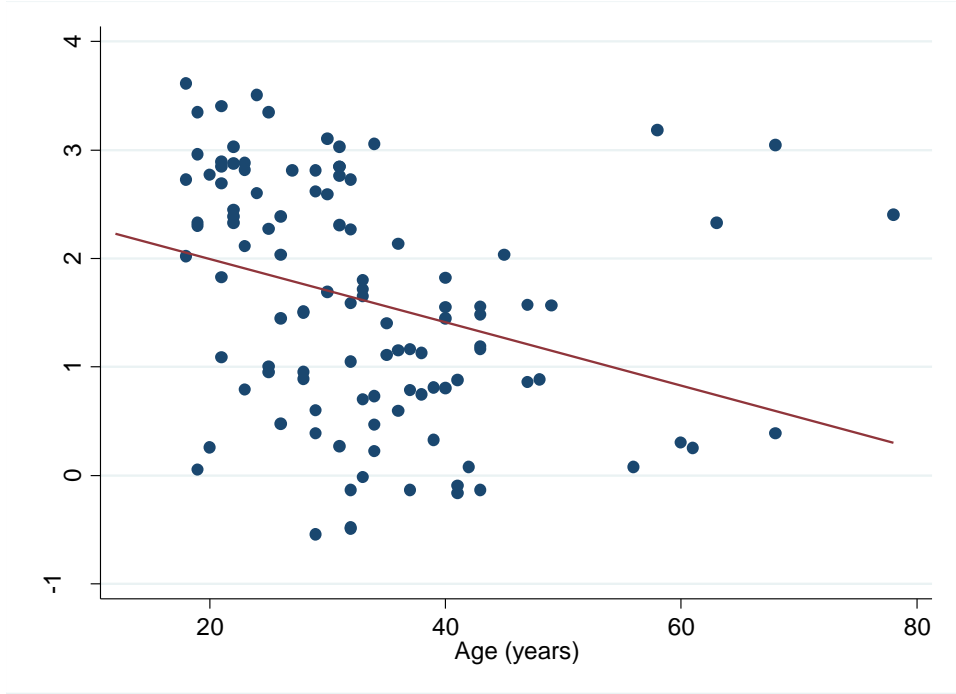

Supplement: tpmd180116.SD1.pdf [file tpmd180116.SD1.pdf]
